# Supplementary material
Source: PubMed Central journal article supplement (PMC3286650)
Supplement: NIHMS213553-supplement-01.pdf [file NIHMS213553-supplement-01.pdf]

## **Supplemental Information**

### **4E-BP1 Is A Key Effector of the Oncogenic Activation of the AKT and ERK Signaling Pathways That Integrates Their Function in Tumors**

**Qing-Bai She, Ensar Halilovic, Qing Ye, Wei Zhen, Senji Shirasawa, Takehiko Sasazuki, David B. Solit, and Neal Rosen**

#### **Inventory of Supplemental Information**

##### **Supplemental Figures**

Figure S1 (A, B): related to Figure 1.

Figure S2 (A, B): related to Figure 2.

Figure S3 (A-E): related to Figure 3.

Figure S4 (A, B): related to Figure 4.

Figure S5: related to Figure 6.

Table S1: related to Figure 1A and Figure S2A.

##### **Supplemental Experimental Procedures**

##### **References**

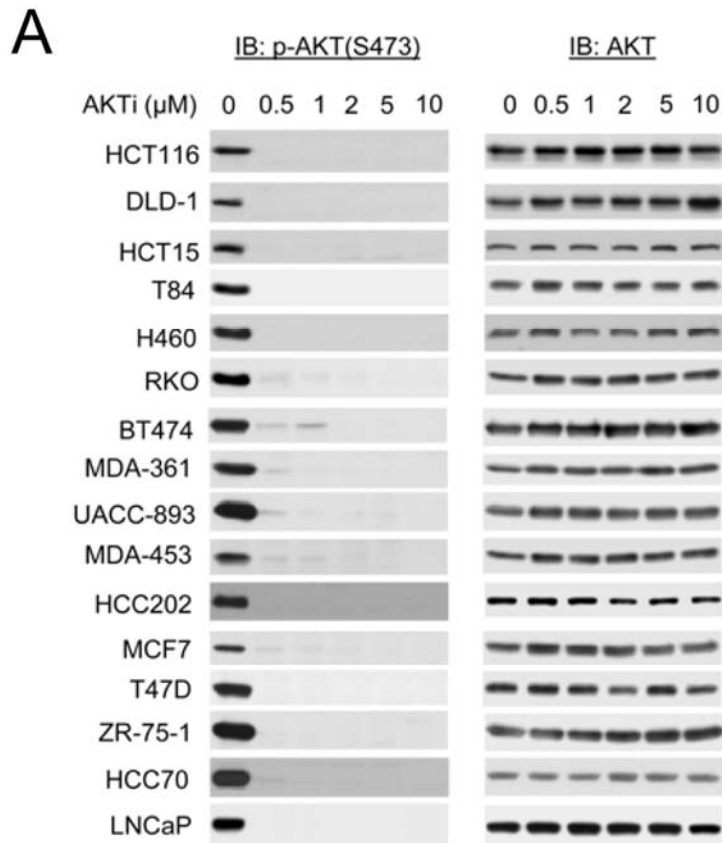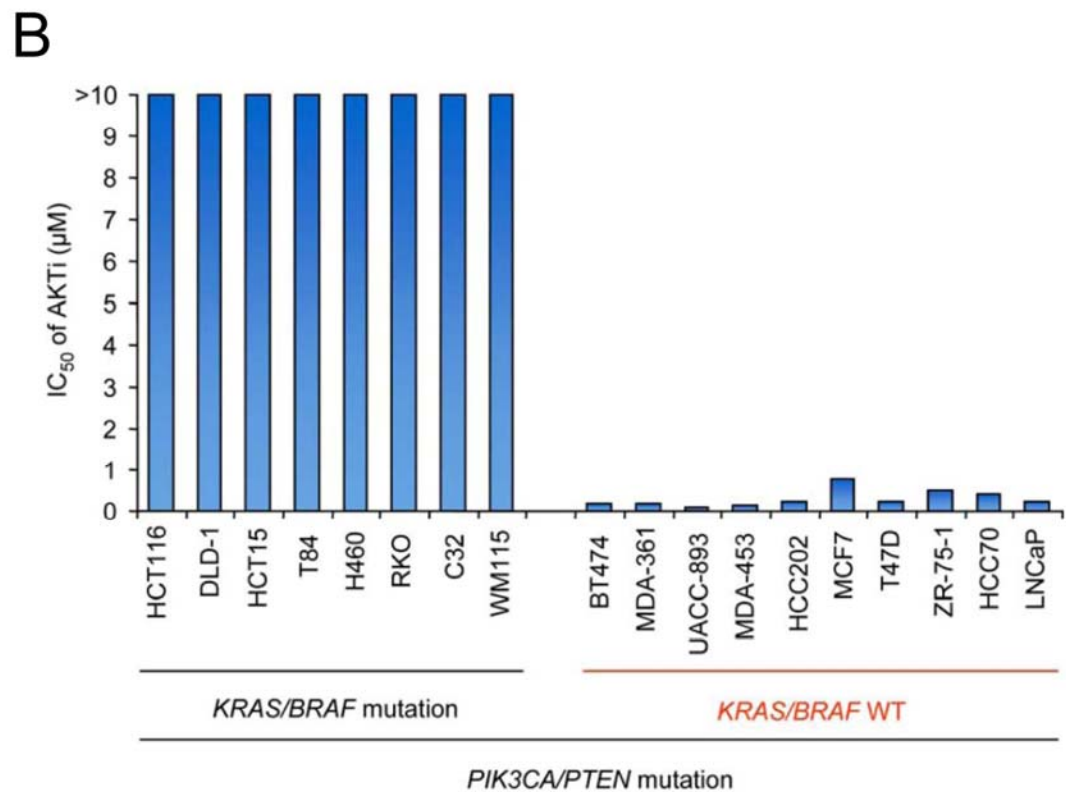

**Figure S1 (related to Figure 1). *PIK3CA* or *PTEN* mutant tumor cells with coexistent *KRAS* or *BRAF* mutations are insensitive to AKT inhibition**

(A) AKTi inhibits AKT phosphorylation and signaling in tumor cells. Cells were treated with various concentrations of AKTi for 24 h. Cell lysates were subjected to immunoblot analysis of Ser473 phosphorylated AKT and total AKT.

(B) Cell proliferation was assessed by a BrdU incorporation assay after 3 days of treatment with AKTi (0-10  $\mu$ M). The results are expressed as half-maximal growth inhibitory concentration ( $IC_{50}$ ) of AKTi.

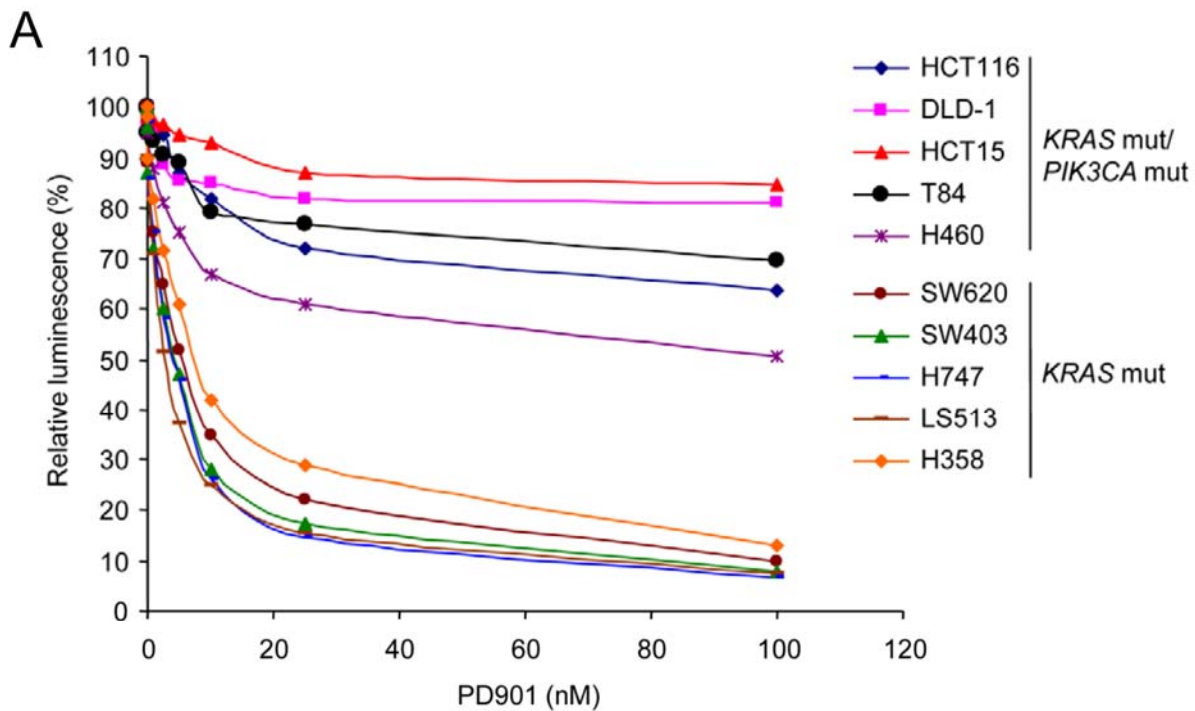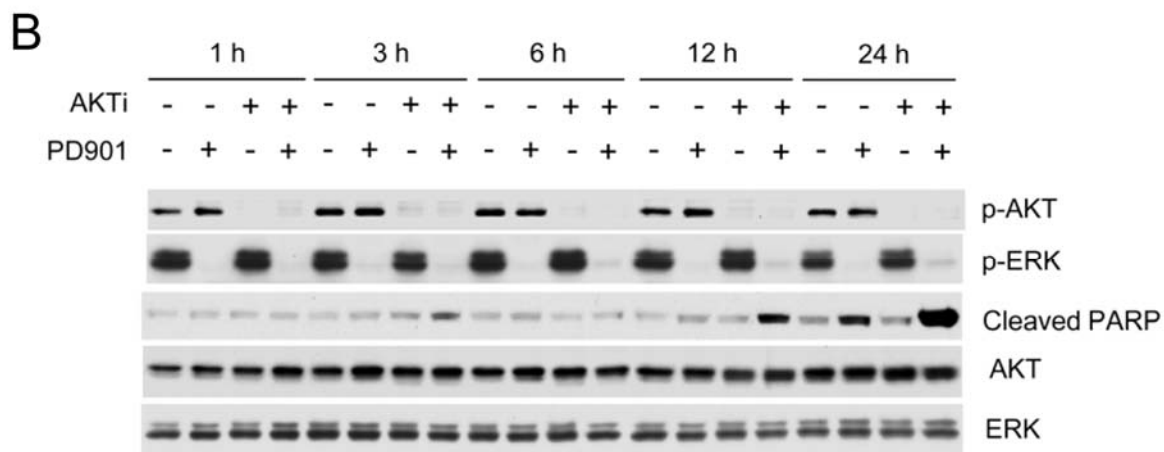

**Figure S2 (related to Figure 2). *KRAS* mutant tumor cells with coexistent *PIK3CA* mutation are resistant to MEK inhibition**

(A) Cell growth was assessed by using the CellTiter-Glo luminescent cell viability assay after 3 days of treatment with PD0325901 (0-100 nM). The results are expressed as the cell numbers relative to those with the DMSO-treated controls.

(B) Combined inhibition of AKT and ERK synergistically induces expression of cleaved PARP. HCT116 cells were treated with 50 nM PD901 and 1  $\mu$ M AKTi, alone or in combination, and the cell lysates were immunoblotted with the indicated antibodies.

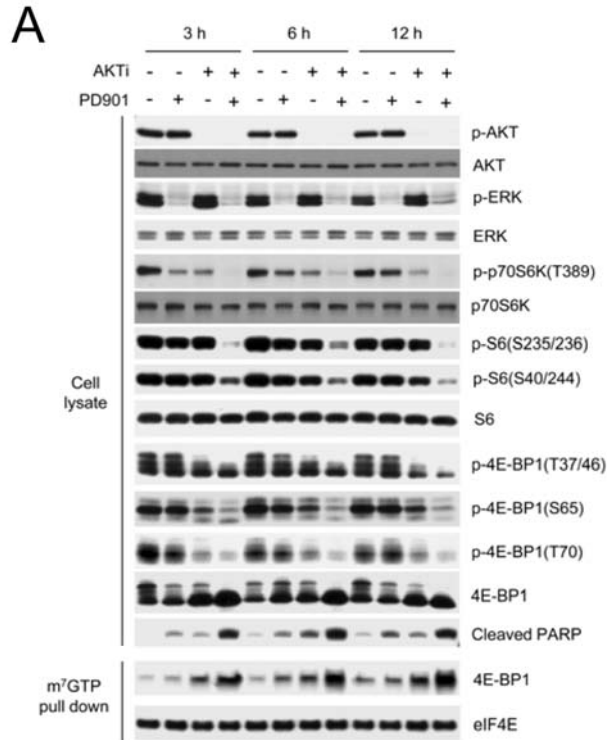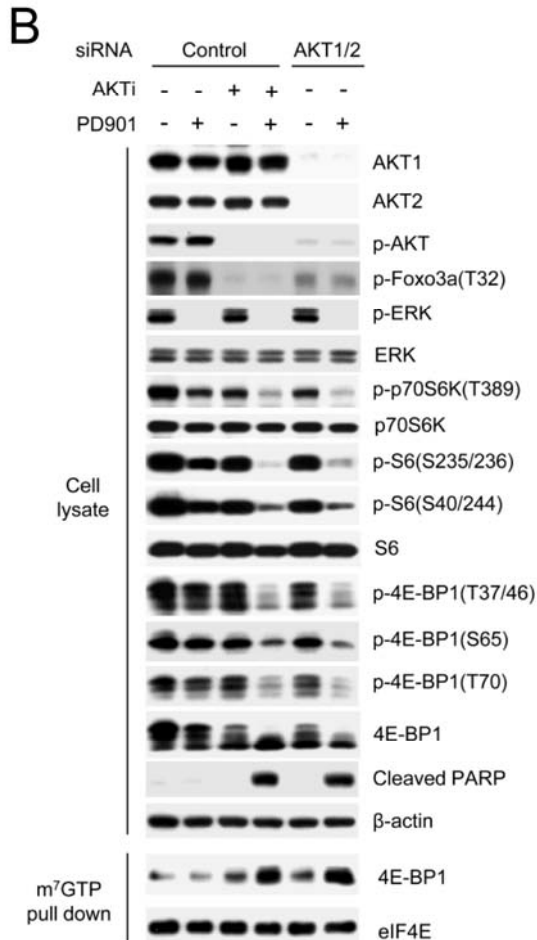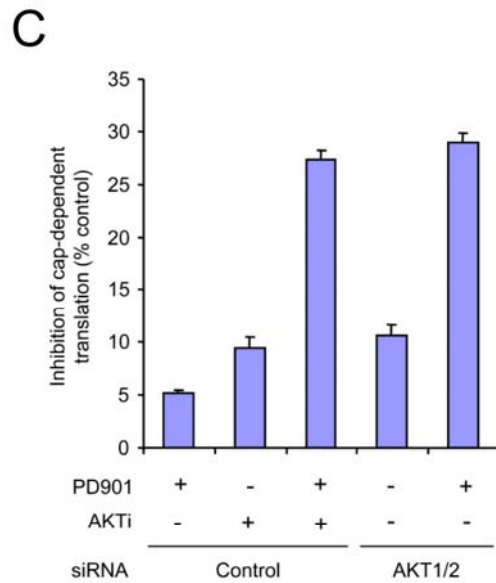

D

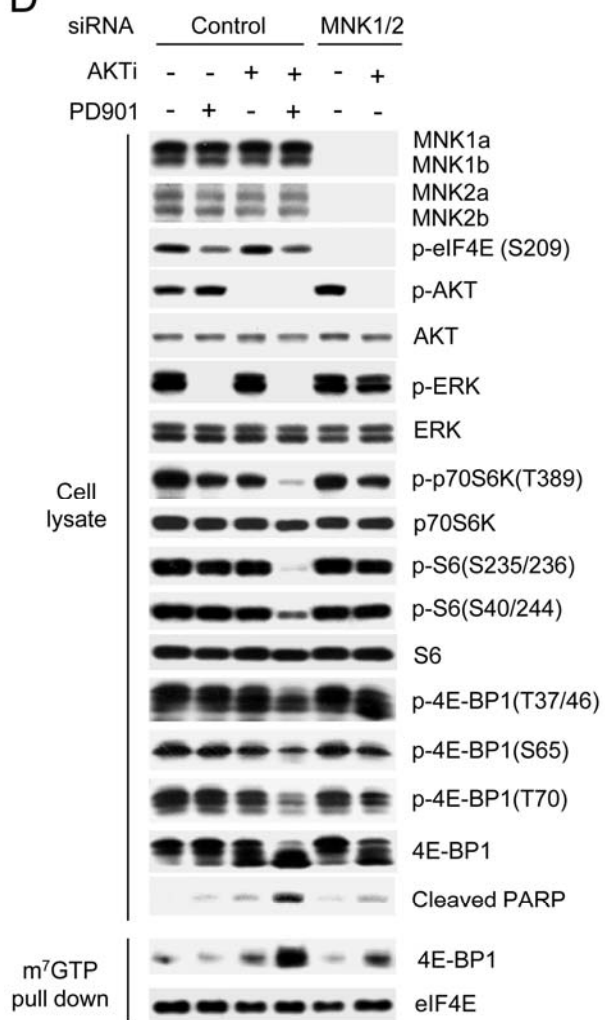

E

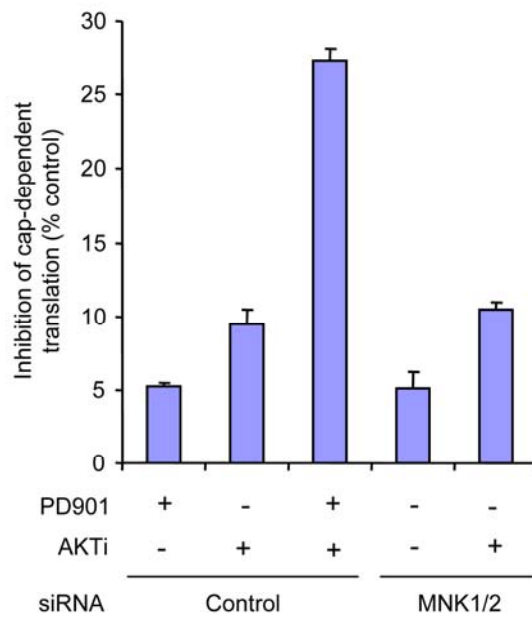

**Figure S3 (related to Figure 3).**

**(A) Combined inhibition of AKT and MEK is required to maximally dephosphorylate 4E-BP1 and induce its binding to eIF4E.** T84 cells were treated with 100 nM PD901 and 1  $\mu$ M AKTi, alone or in combination. Cell lysates were immunoblotted with the indicated antibodies or precipitated with m<sup>7</sup>GTP sepharose beads followed by immunoblotting of 4E-BP1 and eIF4E.

**(B and C) Knockdown of AKT1 and AKT2 expression and pharmacologic inhibition of AKT activity have similar effects on cap-dependent translation.** (B) siRNAs against the indicated genes or control siRNAs were transfected into HCT116 cells and incubated for 54 h. The cells were then treated with 50 nM PD0325901 and 1  $\mu$ M AKTi, alone or in combination for 6 h. Cell lysates were immunoblotted with the indicated antibodies or precipitated with m<sup>7</sup>GTP sepharose beads followed by immunoblotting of 4E-BP1 and eIF4E. (C) siRNAs against the indicated genes or control siRNAs were transfected into HCT116 cells and incubated for 30 h. The cells were then transfected with a bicistronic luciferase reporter plasmid for 24 h, and then treated with 50 nM PD0325901 and 1  $\mu$ M AKTi, alone or in combination for an additional 12 h. The inhibition of cap-dependent translation was determined as in Figure 3C. Values represent means  $\pm$  SEM (n=3).

**(D and E) MNK1/2 do not mediate the effects of MEK/ERK signaling on Cap-Dependent Translation.** (D) siRNAs against the indicated genes or control siRNAs were transfected into HCT116 cells and incubated for 54 h. The cells were then treated with 50 nM PD0325901 and 1  $\mu$ M AKTi, alone or in combination for 6 h. Cell lysates were immunoblotted with the indicated antibodies or precipitated with m<sup>7</sup>GTP sepharose beads followed by immunoblotting of 4E-BP1 and eIF4E. (E) siRNAs against the indicated genes or control siRNAs were transfected into HCT116 cells and incubated for 30 h. The cells were then transfected with a bicistronic luciferase reporter plasmid for 24 h, and then treated with 50 nM PD0325901 and 1  $\mu$ M AKTi, alone or in combination for an additional 12 h. The inhibition of cap-dependent translation was determined as in Figure 3C. Values represent means  $\pm$  SEM (n=3).

**A**

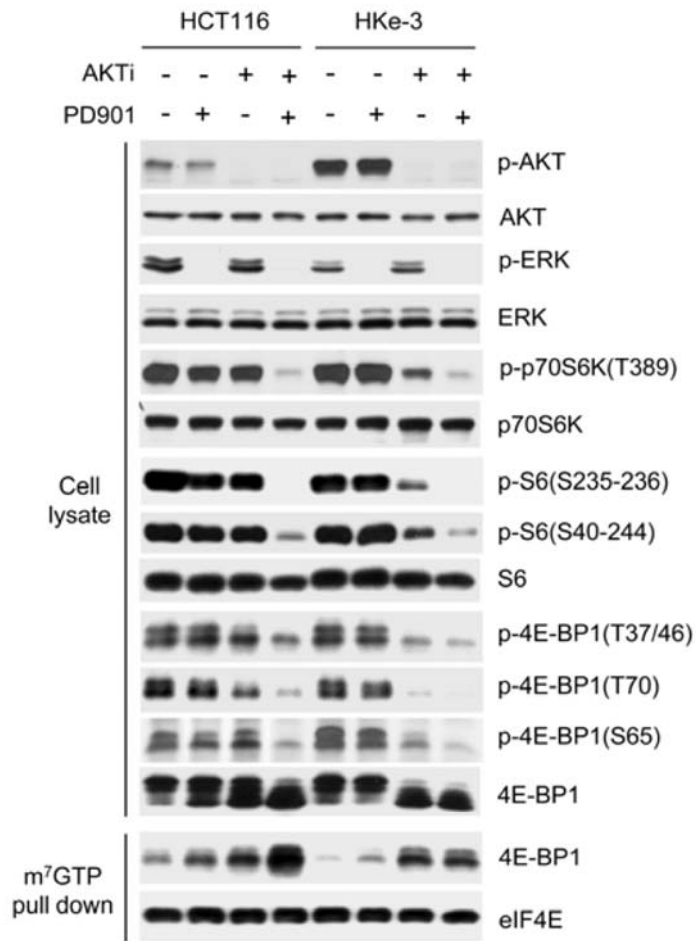

**B**

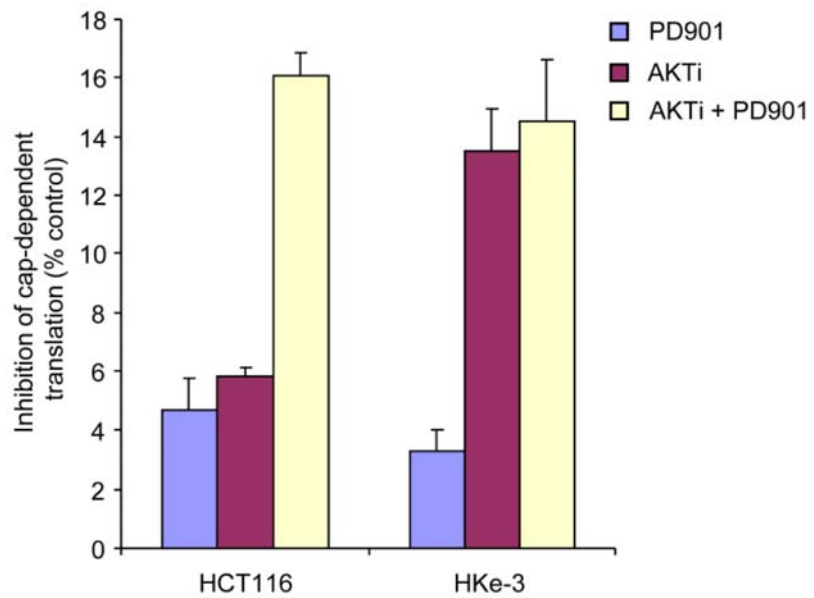



**Figure S4 (related to Figure 4). Deletion of mutant *KRAS* restores AKT dependence on cap-dependent translation**

(A) Cells were treated with 50 nM PD901 and 1  $\mu$ M AKTi, alone or in combination for 6 h. Cell lysates were immunoblotted with the indicated antibodies or precipitated with m<sup>7</sup>GTP sepharose beads followed by immunoblotting of 4E-BP1 and eIF4E.

(B) Cells were transfected with a bicistronic luciferase reporter plasmid and then treated with 50 nM PD901 and 1  $\mu$ M AKTi, alone or in combination for 12 h. The inhibition of cap-dependent translation was determined as in Figure 3C, and the results represent mean  $\pm$  SE of triplicate samples.

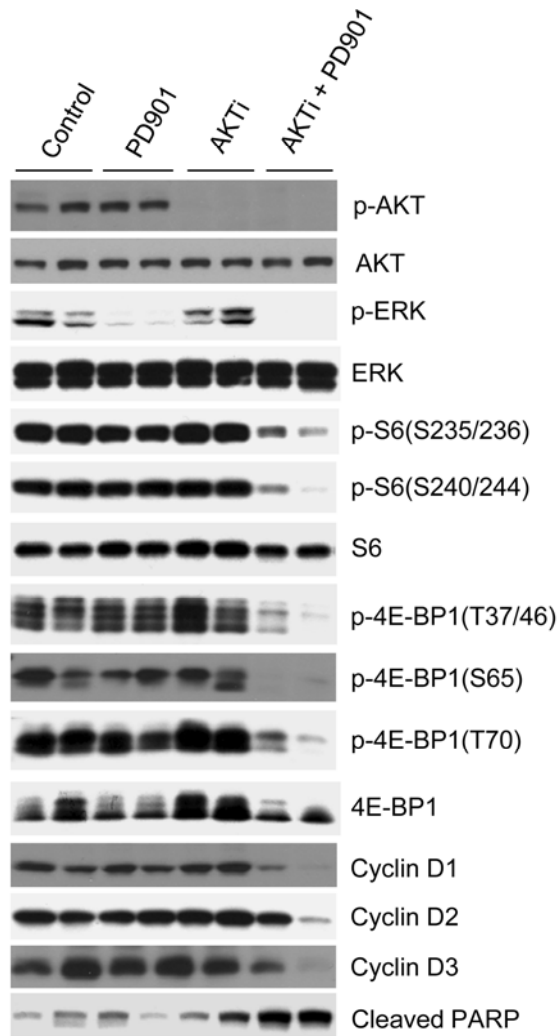

**Figure S5 (related to Figure 6). 4E-BP1 phosphorylation is repressed after combined inhibition of AKT and MEK in vivo.**

Representative tumors from mice bearing DLD-1 xenografts in Figure 6D were lysed 6 h after the final treatment with PD0325901 (5 mg/kg), AKTi (100 mg/kg), combination of both drugs, or vehicle control. Tumor lysates were immunoblotted with the indicated antibodies.

**Table S1 (related to Figure 1A and Figure S2A). Human tumor cell lines with oncogene mutations in PI3K/AKT and RAS/RAF/MEK/ERK pathways**

| Cell Line * | Cancer type | PI3K pathway defects | RAS pathway defects |
|-------------|-------------|----------------------|---------------------|
| HCT116 †    | Colon       | <i>PIK3CA</i> H1047R | <i>KRAS</i> G13D    |
| DLD-1 †     | Colon       | <i>PIK3CA</i> E545K  | <i>KRAS</i> G13D    |
| HCT15       | Colon       | <i>PIK3CA</i> E545K  | <i>KRAS</i> G13D    |
| T84         | Colon       | <i>PIK3CA</i> E542K  | <i>KRAS</i> G13D    |
| RKO         | Colon       | <i>PIK3CA</i> H1047R | <i>BRAF</i> V600E   |
| SW620       | Colon       |                      | <i>KRAS</i> G12V    |
| SW403       | Colon       |                      | <i>KRAS</i> G12V    |
| H747        | Colon       |                      | <i>KRAS</i> G13D    |
| LS513       | Colon       |                      | <i>KRAS</i> G12D    |
| C32         | Melanoma    | <i>PTEN</i> null     | <i>BRAF</i> V600E   |
| WM115       | Melanoma    | <i>PTEN</i> null     | <i>BRAF</i> V600E   |
| H460        | Lung        | <i>PIK3CA</i> E545K  | <i>KRAS</i> Q61K    |
| H358        | Lung        |                      | <i>KRAS</i> G12C    |
| BT474 ‡     | Breast      | <i>PIK3CA</i> K111N  |                     |
| MDA-361 ‡   | Breast      | <i>PIK3CA</i> E545K  |                     |
| UACC-893 ‡  | Breast      | <i>PIK3CA</i> H1047R |                     |
| MDA-453 ‡   | Breast      | <i>PIK3CA</i> H1047R |                     |
| HCC202 ‡    | Breast      | <i>PIK3CA</i> E545K  |                     |
| MCF7 ‡      | Breast      | <i>PIK3CA</i> E545K  |                     |
| T47D ‡      | Breast      | <i>PIK3CA</i> H1047R |                     |
| ZR-75-1 ‡   | Breast      | <i>PTEN</i> null     |                     |
| HCC70 ‡     | Breast      | <i>PTEN</i> null     |                     |
| LNCaP       | Prostate    | <i>PTEN</i> null     |                     |

\* Mutations in *PIK3CA*, *PTEN*, *KRAS* and *BRAF* are from cosmic database, <http://www.sanger.ac.uk/genetics/CGP/cosmic/>.

† Mutations in *PIK3CA* (Samuels et al., 2005) and *KRAS* (Shirasawa et al., 1993) have been reported in these cell lines.

‡ Mutations in *PIK3CA* and *PTEN* have been reported in these cell lines (Hollestelle et al., 2007; Saal et al., 2005)

## Supplemental Experimental Procedures

### Immunoblot Analysis

Cells were lysed in NP-40 lysis buffer as described (She et al., 2008) and incubated for 30 min at 4°C. Cell debris was removed by centrifugation at 10,000 × g for 10 min at 4°C and the protein concentration of the supernatant was determined by BCA assay (Pierce). Equal amounts of total protein were resolved by SDS-PAGE, transferred to membranes, immunoblotted with specific primary and secondary antibodies and detected using chemiluminescence (GE Healthcare). Antibodies for p-AKT(S473), p-ERK, p-FOXO1(T24)/FOXO3(T32), p-p70S6K(T389), p-p70S6K(T421/S424), p-S6(S235/236), p-S6(S240/244), p-4E-BP1(T37/46), p-4E-BP1(S65), p-4E-BP1(T70), p-eIF4E(S209), AKT1, AKT2, pan-AKT, ERK, MNK1, 4E-BP1, 4E-BP2, eIF4E and cleaved PARP were from Cell Signaling Technology. Cyclin D1, KRAS, MNK2 and HA antibodies were from Santa Cruz Biotechnology and β-actin antibody was from Sigma.

### References

- Hollestelle, A., Elstrodt, F., Nagel, J. H., Kallemeijn, W. W., and Schutte, M. (2007). Phosphatidylinositol-3-OH kinase or RAS pathway mutations in human breast cancer cell lines. *Mol. Cancer Res.* 5, 195-201.
- Saal, L. H., Holm, K., Maurer, M., Memeo, L., Su, T., Wang, X., Yu, J. S., Malmstrom, P. O., Mansukhani, M., Enoksson, J., *et al.* (2005). PIK3CA mutations correlate with hormone receptors, node metastasis, and ERBB2, and are mutually exclusive with PTEN loss in human breast carcinoma. *Cancer Res.* 65, 2554-2559.
